# Supplementary material for: Evaluating Plant Gene Models Using Machine Learning
Source: MDPI journal article supplement (doi:10.3390/plants11121619), 2022-06-20
Supplement: s1 [file s1]

*Supplementary Materials*

# Evaluating Plant Gene Models Using Machine Learning

**Shriprabha R. Upadhyaya<sup>1</sup>, Philipp E. Bayer<sup>1</sup>, Cassandra G. Tay Fernandez<sup>1</sup>, Jakob Petereit<sup>1</sup>, Jacqueline Batley<sup>1</sup>, Mohammed Bennamoun<sup>2</sup>, Farid Boussaid<sup>3</sup> and David Edwards<sup>1,\*</sup>**

<sup>1</sup> School of Biological Sciences, University of Western Australia, Perth, WA 6000, Australia; 22888361@student.uwa.edu.au (S.R.U.); philipp.bayer@uwa.edu.au (P.E.B.); cassandra.tayfernandez@research.uwa.edu.au (C.G.T.F.); jakob.petereit@uwa.edu.au (J.P.); jacqueline.batley@uwa.edu.au (J.B.)

<sup>2</sup> Department of Computer Science and Software Engineering, University of Western Australia, Perth, WA 6000, Australia; mohammed.bennamoun@uwa.edu.au (M.B.);

<sup>3</sup> Department of Electrical, Electronic and Computer Engineering, University of Western Australia, Perth, WA 6000, Australia; farid.boussaid@uwa.edu.au (F.B.)

\* Correspondence: dave.edwards@uwa.edu.au

---

**Table S1.** List of protein features calculated for the high confidence and low confidence amino acid sequences.

| <b>Protein Feature name</b>               | <b>Number of features</b> | <b>Module used</b>                |
|-------------------------------------------|---------------------------|-----------------------------------|
| Amino acids sequence length               | 1                         | Biopython Prot param              |
| Start codon                               | 1                         | Biopython Prot param              |
| Amino acid percentage                     | 20 – all amino acids      | Biopython Prot param and Alphabet |
| Isoelectric point                         | 1                         | Biopython Prot param              |
| Grand Average of Hydropathy (GRAVY) value | 1                         | Biopython Prot param              |
| Molecular weight                          | 1                         | Biopython Prot param              |
| Instability Index                         | 1                         | Biopython Prot param              |
| Secondary structure fraction              | 3 – helix, turn, sheet    | Biopython Prot param              |
| Flexibility                               | 1                         | Biopython Prot param              |
| Aromaticity                               | 1                         | Biopython Prot param              |
| Molar extinction co-efficient             | 2 – oxidised, reduced     | Biopython Prot param              |
| Aliphatic index                           | 1                         | In-house script                   |
| Aliphaticity                              | 1                         | In-house script                   |
| Charge                                    | 1                         | In-house script                   |
| Polar amino acids                         | 1                         | In-house script                   |
| Nonpolar amino acids                      | 1                         | In-house script                   |
| Acidic amino acids                        | 1                         | In-house script                   |
| Basic amino acids                         | 1                         | In-house script                   |
| Tiny amino acids                          | 1                         | In-house script                   |

**Table S2.** List of nucleotide features calculated for the high confidence and low confidence nucleotide sequences.

| Nucleotide feature name      | Number of features                                        | Module used                         |
|------------------------------|-----------------------------------------------------------|-------------------------------------|
| Nucleotide sequence length   | 1                                                         | Biopython SeqUtils                  |
| GC Content                   | 1                                                         | Biopython SeqUtils                  |
| GC position                  | 3 – 1 <sup>st</sup> , 2 <sup>nd</sup> and 3 <sup>rd</sup> | Biopython SeqUtils                  |
| GC skew                      | 3 – Mean, Median, Standard deviation                      | Biopython SeqUtils                  |
| Melting temperature          | 1                                                         | Biopython SeqUtils                  |
| Molecular weight             | 1                                                         | Biopython SeqUtils                  |
| Shannon entropy              | 1                                                         | Scipy stats                         |
| Zlib compression ratio       | 1                                                         | Python zlib, in-house script        |
| Codon Adaptation Index (CAI) | 1                                                         | Biopython Alphabet, in house script |
| Intergenic region            | 1                                                         | Python, in house script             |

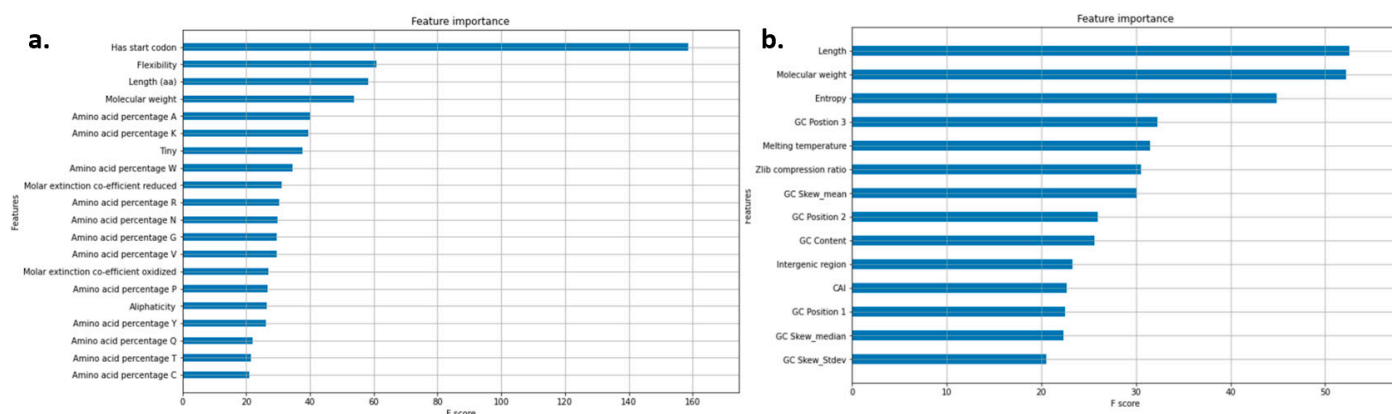

**Figure S1.** XGBoost Cover plot for (a) Protein model shows tops 20 features (b) Nucleotide model. CAI = Codon Adaptation Index, GC\_Stdev: Standard deviation of GC skew value.

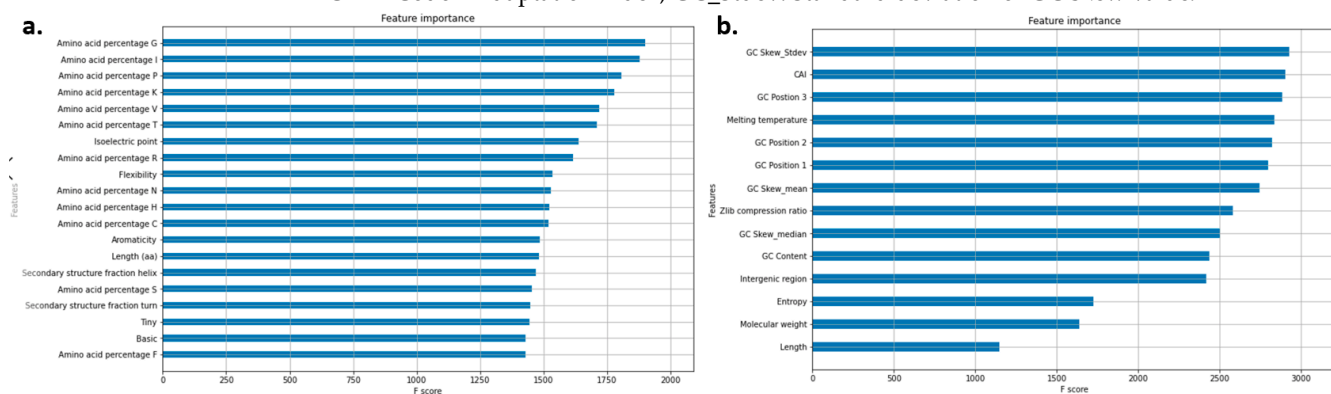

**Figure S2.** XGBoost Weight plot for (a) Protein model shows top 20 features (b) Nucleotide model. CAI = Codon Adaptation Index, GC\_Stdev: Standard deviation of GC skew value.

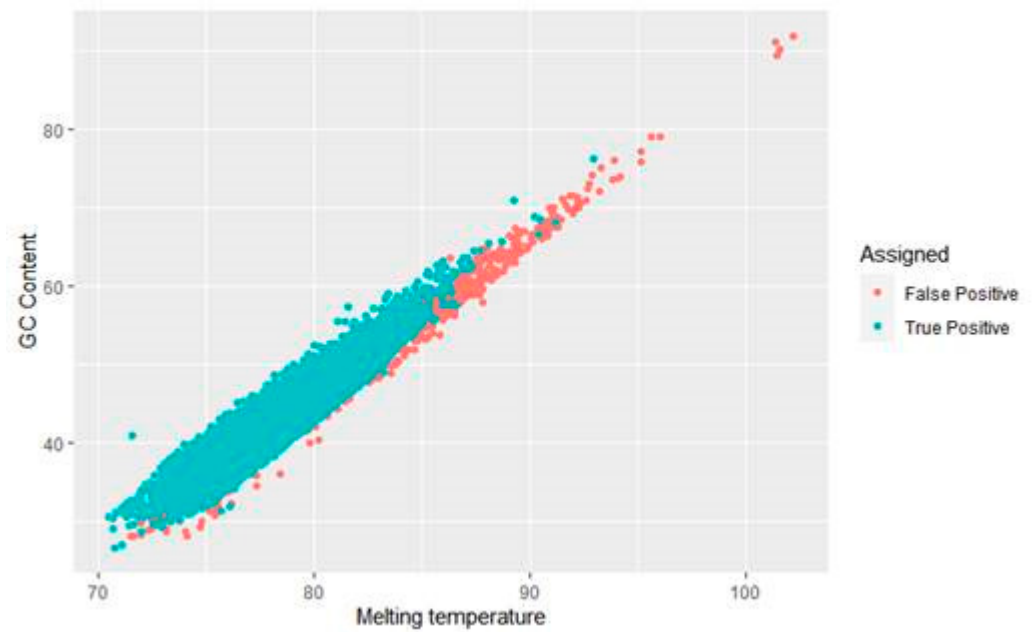

**Figure S3.** Correlation between GC content and Melting temperature. True positive refers to the high confidence conserved genes and False positive refers to low confidence non-conserved genes.

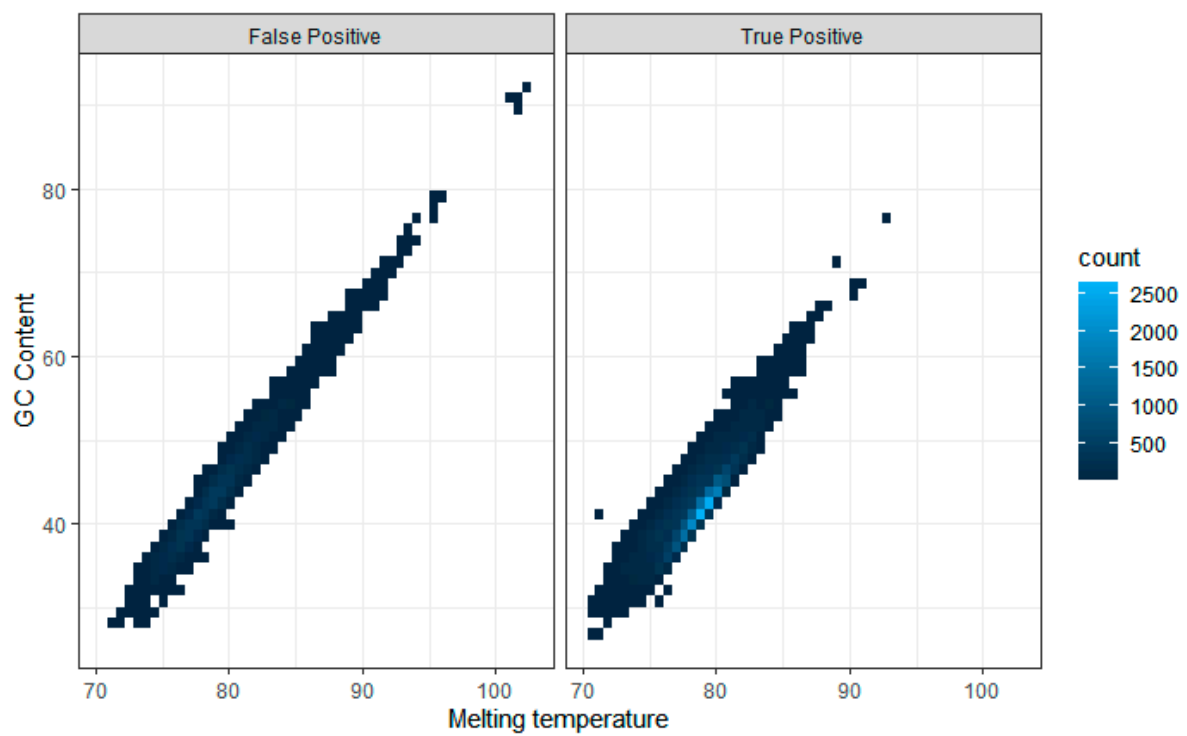

**Figure S4.** Heatmap of GC content plotted against melting temperature.
